# Supplementary material for: Two polymeric 36-metal pure lanthanide nanosize clusters
Source: Royal Society of Chemistry journal article supplement (doi:10.1039/c3sc50887k), 2013-01-01
Supplement: c3sc50887k.pdf [file c3sc50887k.pdf]

## Magnetic properties of two polymeric 36-nuclear pure lanthanide clusters

Mingyan Wu,<sup>a</sup> Feilong Jiang,<sup>a</sup> Xiangjian Kong,<sup>b</sup> Daqiang Yuan,<sup>a</sup> Lasheng Long,<sup>b</sup> Maochun Hong<sup>\*a</sup>

<sup>a</sup> State Key Laboratory of Structure Chemistry, Fujian Institute of Research on the Structure of Matter, Chinese Academy of Sciences, Fuzhou, Fujian, 350002, China.

E-mail: [hmc@fjirsm.ac.cn](mailto:hmc@fjirsm.ac.cn); Fax: +86-591-83794946; Tel: +86-591-83792460.

<sup>b</sup> State Key Laboratory of Physical Chemistry of Solid Surfaces, Department of Chemistry, College of Chemistry and Chemical Engineering, Xiamen University, Xiamen 361005, China

### Supporting Information

**Figure S1** In the Gd<sub>24</sub> wheel, six tetrahedral Gd<sub>4</sub> clusters form a cyclohexane chair-like structure (The joints between the centroids are in orange solid lines). The triangle constructed by three centroids of the 'up' Gd<sub>4</sub> units is in blue dashed lines and the other one in red dashed lines.

**Figure S2** In the Gd<sub>36</sub> cluster, there are six topologically non-equivalent Gd(III) vertexes, i.e. one three-connected one ( in red ), one four-connected one ( in blue ), one five-connected one ( in cyan ), and three six-connected ones ( in green, orange and violet respectively).

**Figure S3** Through the coordination of the carboxylic groups of the NA ligands to the Gd(III) cations, the Gd<sub>36</sub> units form a square layer. For clarity, only the bridge NA ligands are shown in the figure.

**Figure S4** For **2**, *M* vs. *H* data at various temperatures are shown on a single *M* vs. *H/T* plot.

**Figure S5** For **1**, *M* vs. *H* data at various temperatures.

**Figure S6** PXRD for complexes **1** and **2**. Above: The diffraction angle  $\theta$  is from 3.8 to 50 °. Bottom: To identify the PXRD patterns in detail, we give the diffraction patterns in the range of 6 – 30 °.

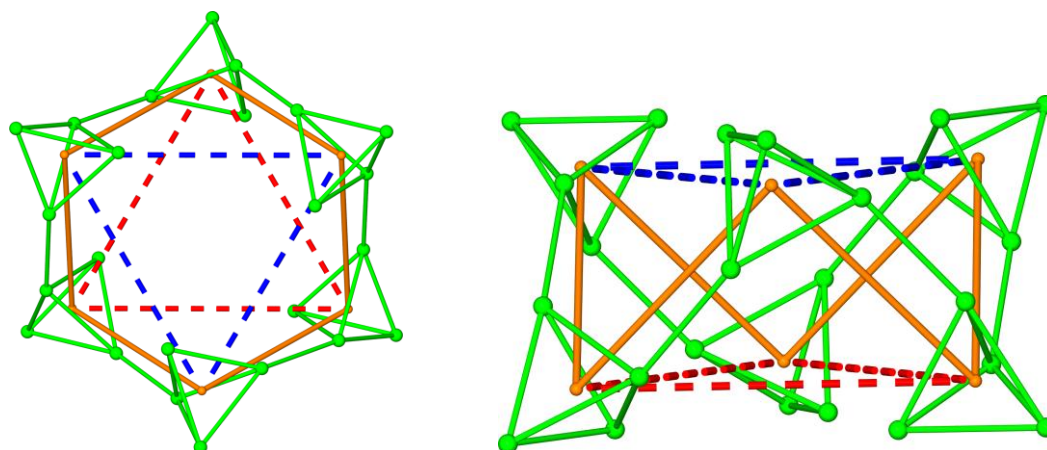

**Figure S1** In the  $Gd_{24}$  wheel, six tetrahedral  $Gd_4$  clusters form a cyclohexane chair-like structure (The joints between the centroids are in orange solid lines). The triangle constructed by three centroids of the 'up'  $Gd_4$  units is in blue dashed lines and the other one in red dashed lines.

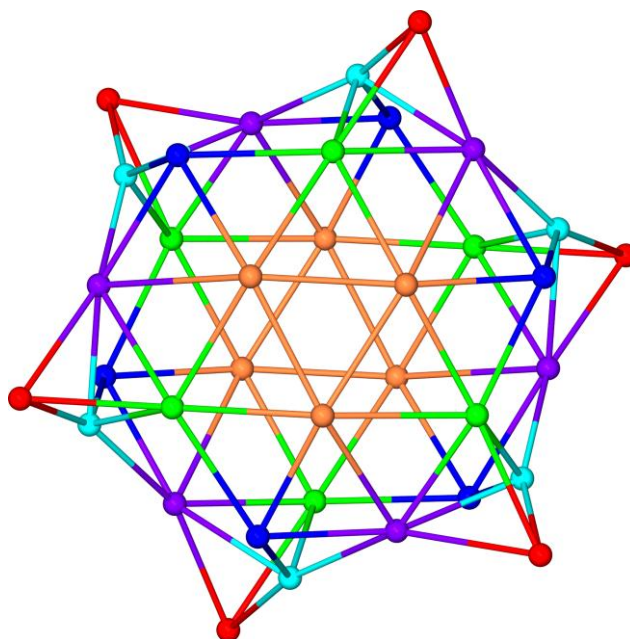

**Figure S2** In the  $Gd_{36}$  cluster, there are six topologically non-equivalent  $Gd(III)$  vertices, i.e. one three-connected one ( in red ), one four-connected one ( in blue ), one five-connected one ( in cyan ), and three six-connected ones ( in green, orange and violet respectively).

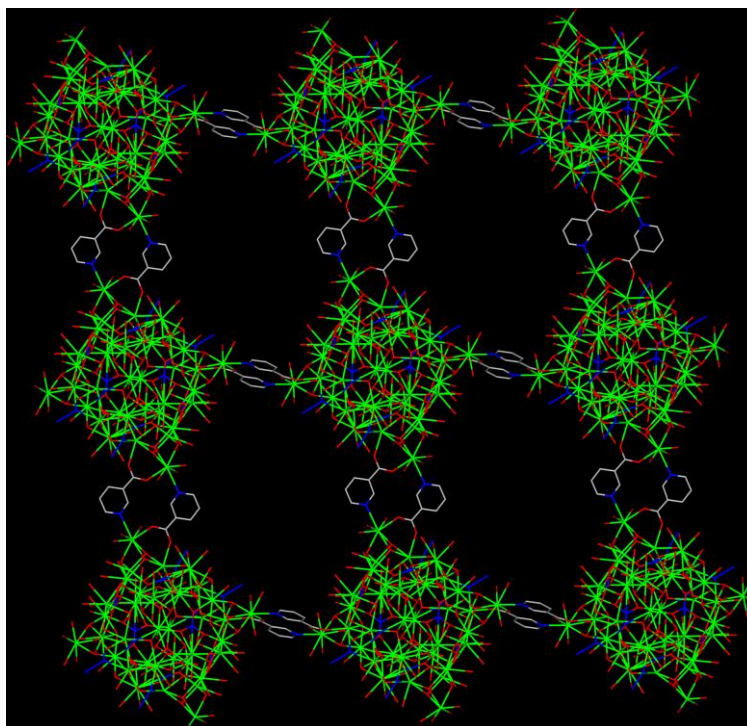

**Figure S3** Through the coordination of the carboxylic groups of the NA ligands to the Gd(III) cations, the Gd<sub>36</sub> units form a square layer. For clarity, only the bridge NA ligands are shown in the figure.

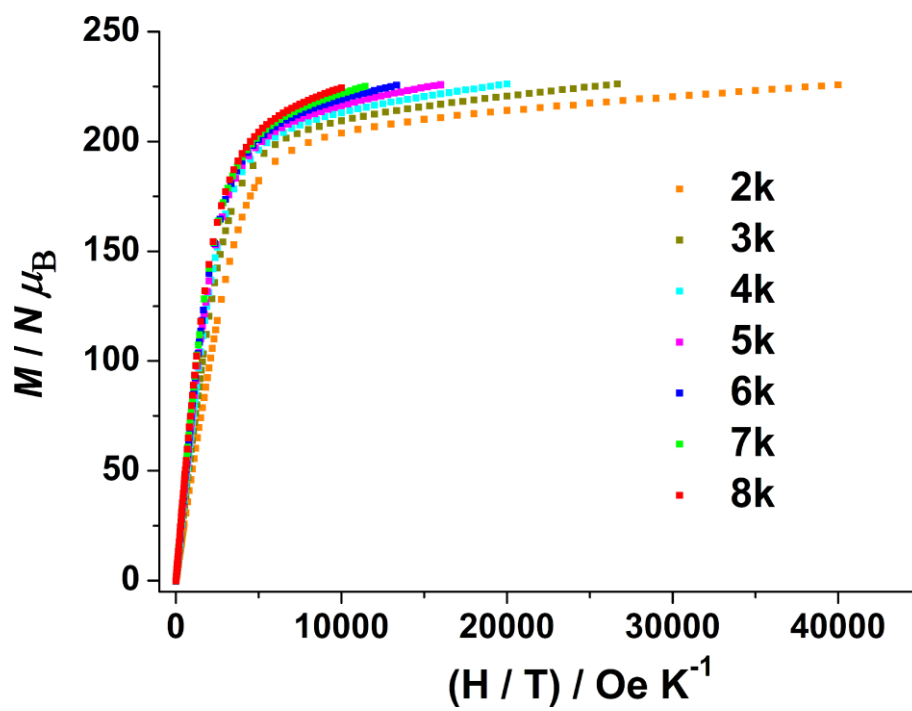

**Figure S4** For 2,  $M$  vs.  $H$  data at various temperatures are shown on a single  $M$  vs.  $H/T$  plot.

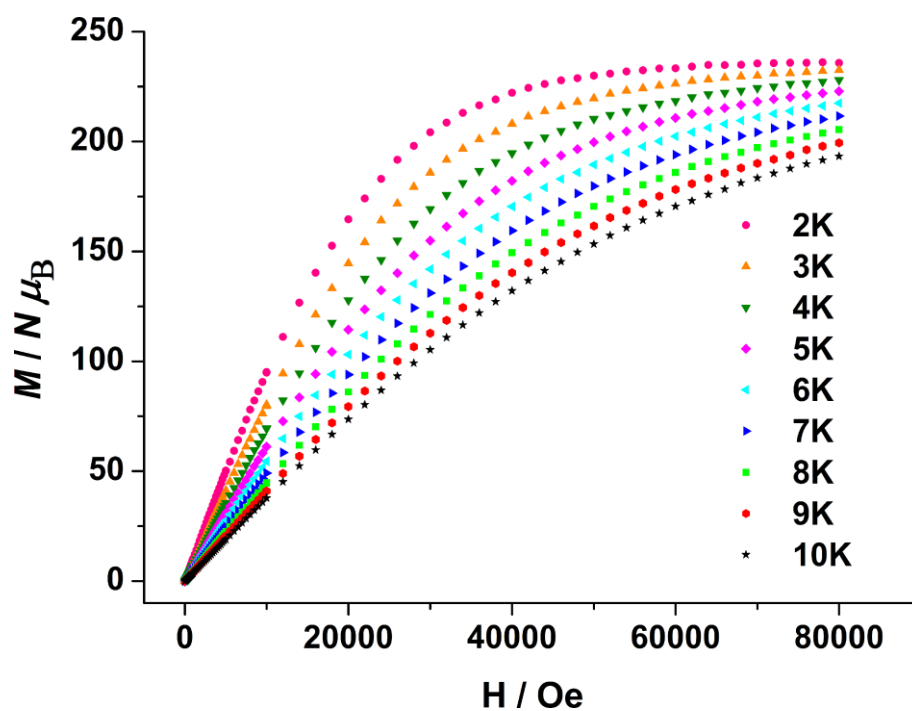

Figure S5 For **1**,  $M$  vs.  $H$  data at various temperatures.

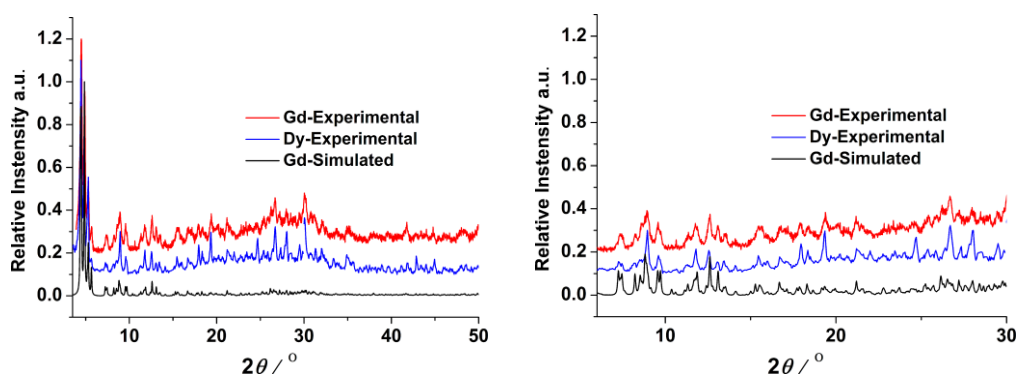

Figure S6 PXRD for complexes **1** and **2**. The diffraction angle  $\theta$  is from  $3.8$  to  $50^\circ$  (left). To identify the PXRD patterns in detail, we give the diffraction patterns in the range of  $6 - 30^\circ$  (right).
